# Supplementary material for: Anti-biofouling surface with sub-20 nm heterogeneous nanopatterns
Source: Royal Society of Chemistry journal article supplement (doi:10.1039/c4tb01905a), 2014-12-09
Supplement: c4tb01905a1.pdf [file c4tb01905a1.pdf]

Supporting Information for:

## Anti-biofouling Surface with Sub-20 nm Heterogeneous Nanopatterns

Lei Shen<sup>a,\*</sup>, Jun Xie<sup>a,b</sup>, Juan Tao<sup>b,\*</sup>, Jintao Zhu<sup>b,\*</sup>

<sup>a</sup>School of Chemistry and Chemical Engineering, Huazhong University of Science and Technology (HUST), Wuhan, 430074, China

<sup>b</sup>Department of Dermatology, Affiliated Union Hospital, Tongji Medical College, HUST, Wuhan, 430022, China

Supporting Figures:

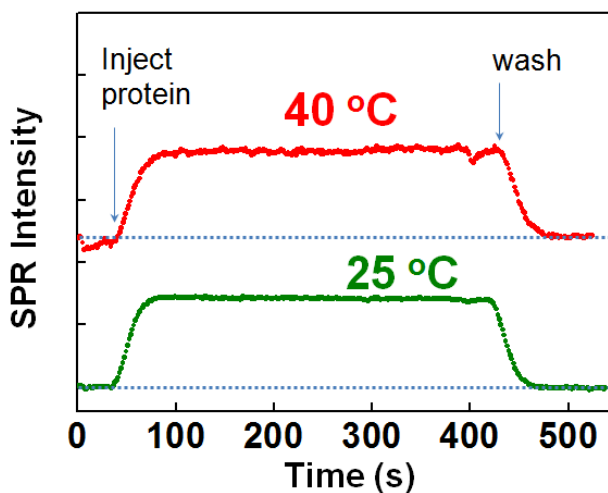

**Figure S1.** The SPR response for lysozyme adsorption on PS<sub>60</sub>-b-PHEMA<sub>150</sub> nanopatterns at different temperatures, 25 and 40 °C. The concentration of lysozyme is 50 µg/mL.

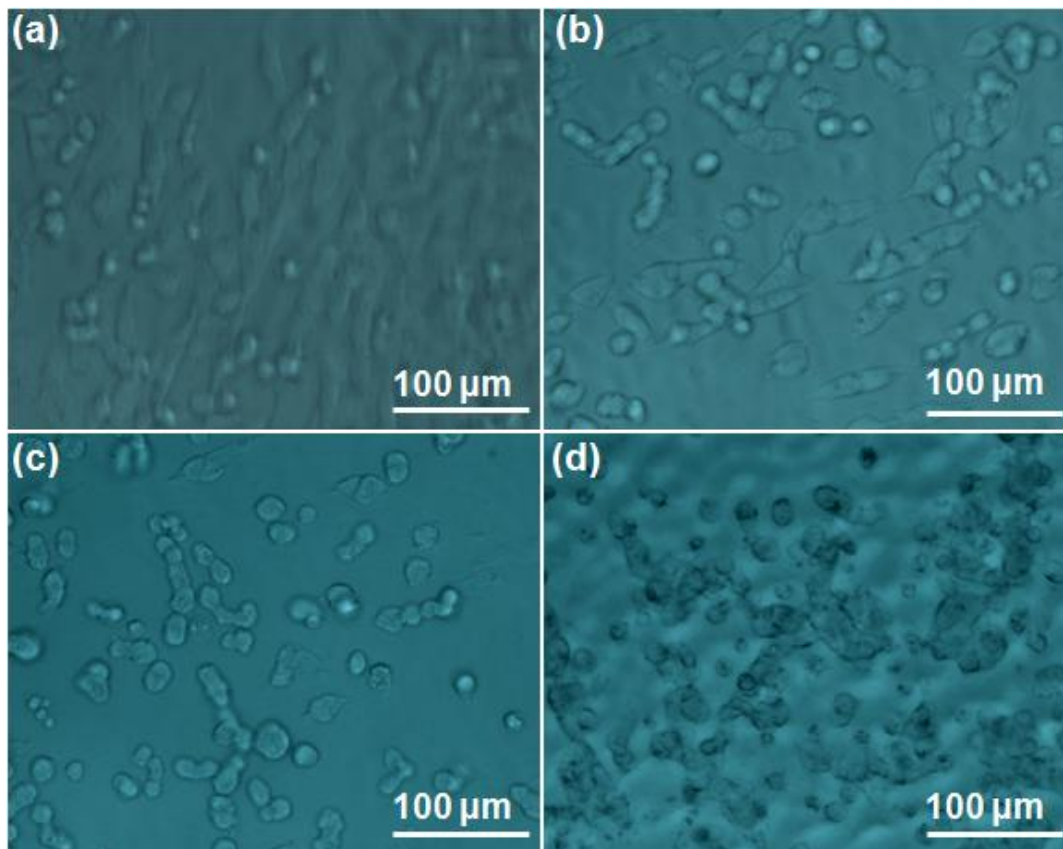

**Figure S2.** Optical microscopy images of human melanoma cell A375 after 24 hrs of cultivation on (a) PS, (b) PS<sub>200</sub>-*b*-PHEMA<sub>50</sub>, (c) PS<sub>60</sub>-*b*-PHEMA<sub>150</sub> and (d) PS<sub>140</sub>-*b*-PHEMA<sub>150</sub> thin films.

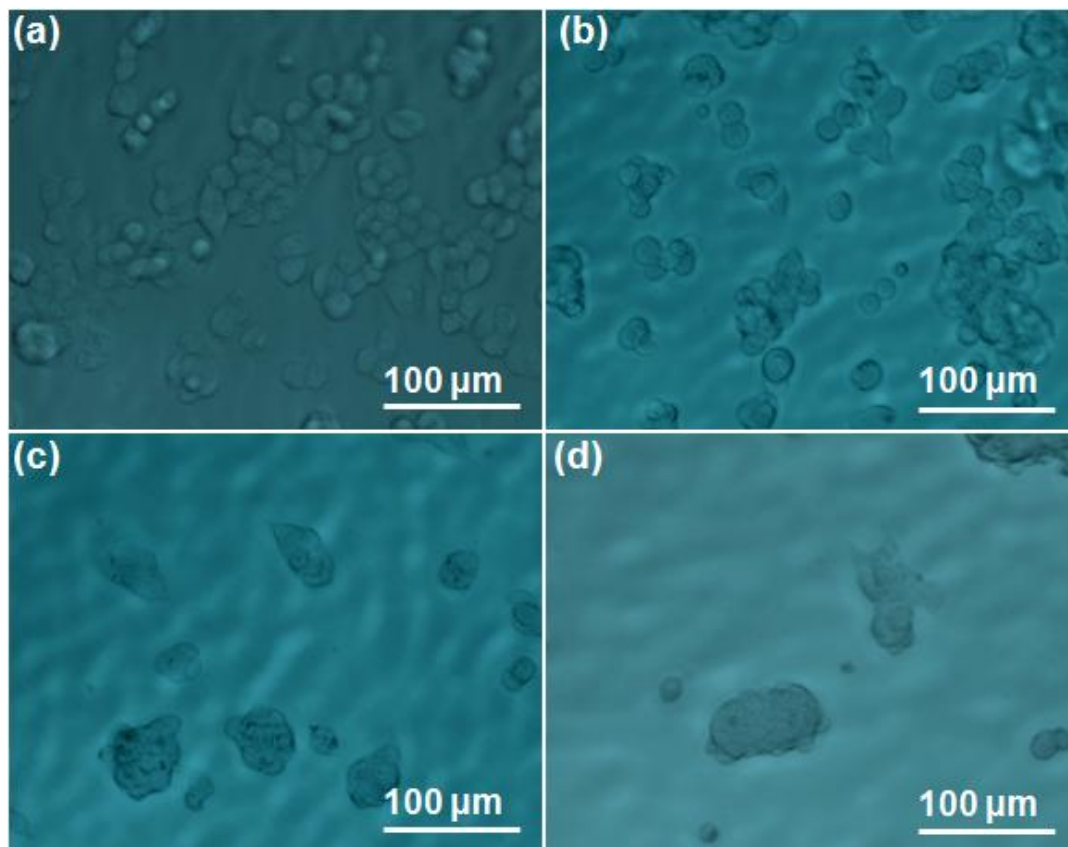

**Figure S3.** Optical microscopy images of human prostate carcinoma cell DU145 after 24 hrs of cultivation on (a) PS, (b) PS<sub>200</sub>-*b*-PHEMA<sub>50</sub>, (c) PS<sub>60</sub>-*b*-PHEMA<sub>150</sub> and (d) PS<sub>140</sub>-*b*-PHEMA<sub>150</sub> thin films.
